# Supplementary material for: The Early Paleogene: A Glimpse of an Extremely Warm World
Source: Research Square preprint supplement (doi:10.21203/rs.3.rs-3428515/v1), 2023-11-13
Supplement: Supplementary file 1 [file 97c74848c8222c80611cafc1.docx]

Supplementary Information for

**The Early Paleogene: A Glimpse of an Extremely Warm World**

**Authors:** Jacob S Slawson1*, Piret Plink-Bjorklund1, Thomas Reichler2, Daniel Baldassare2

Corresponding author: Jacob Slawson, jslawson@mines.edu

**The PDF file includes:**

Supplementary Text

References

**Other Supplementary Information for this manuscript include the following:**

Data S1 – Excel spreadsheet with proxy location data and citations

Data S2 – Interactive web map format of Paleogene climate figures

Data S3 – ArcGIS Pro package containing Early Paleogene climate project

Climate Proxies

Climate proxies that are focused on mean annual precipitation and precipitation intermittency fall into four main categories. Paleosols, or ancient soils, are a product of climate, organisms, topographic relief, parent material or substrate, and time42. When the other soil forming factors are held constant, paleosols may be used to reconstruct climate at the time of formation43. A number of models have been proposed to estimate mean annual precipitation (MAP) and mean annual temperature (MAT) as a function of paleosol geochemistry. Some of the early models utilized molecular weathering ratios that treat loss of labile elements as a function of chemical weathering via mean annual precipitation, such as CIA-K44. More recently, multivariate, machine learning based approaches have been developed to estimate MAP and MAT in statistical frameworks with a better measure of uncertainty and account for the non-linearity of soil development45, 46. Paleosol color may also be related to the intermittency of precipitation, where red colors indicate wetting and drying and blue-green colors indicate water-logged conditions43.

Fossil leaf size and shape can be used to estimate MAT and MAP, respectively47, 48. MAT, MAP, and the intermittency of precipitation can also be estimated based on comparison between species identified in leaf and pollen fossils and their nearest living relatives (NLR) today49.

Fluvial sedimentology is proving increasingly capable of identifying the degree of precipitation intermittency and intensity in the geologic record50, 51. Froude supercritical flow structures, formed during high velocity flows where sediment is transported in suspension, are commonly formed in arid to semi-arid or sub-humid environments today that are prone to flash floods52, and in monsoonal zones where seasonal high-magnitude floods occur51. These structures, and other changes in fluvial sedimentology, such as in-channel bioturbation, have been identified in the geologic record and are indicative of extreme fluctuations in river discharge as a function of precipitation intermittency53.

Clay mineral composition of paleosols and marine deposits can be used to estimate climate conditions54, 55. Feldspars, one of the most common minerals in the Earth’s crust, weather via hydrolysis to produce a predictable series of clay mineral assemblages as a function of chemical weathering55. Kaolinite and gibbsite are indicative of high degrees of weathering and are commonly found in the tropics and subtropics today55. Smectite is indicative of minor precipitation intermittency and moderate precipitation and temperature, such as mid-latitude (30-60°) locations today55. Palygorskite-sepiolite minerals are commonly formed in association with base precipitation, and thus mark locations with moderate to high precipitation intermittency and warm temperatures55. These mineral assemblages may also be produced by physical weathering of sedimentary material, which is typically indicative of locations with low rates of chemical weathering such as cold or dry locations20, 55. Clay mineral assemblages may be altered via diagenesis and other geological processes, so extreme care is taken to cross-validate when using this proxy to reconstruct climate54.

**Climate type definitions**

*Warm, ever-wet (WEW)*

This climate type includes the tropical rainforest (Af) climate in the Köppen-Geiger classification and is defined based on the ever-wet conditions with perennial precipitation style with little seasonal intermittency25, and mean annual temperature (MAT) is >20°C21, 22. Mean annual precipitation (MAP) is >2000 mm21, 56. Vegetation is dominated by evergreen broadleaves such as mangrove, palm, and shorea35, 57. Soil types tend to range from oxisols to ultisols, and the soil B-horizons are marked by kaolinite group clay minerals55, 58. A modern example of such a climate is the Amazon rainforest.

In the Paleogene sedimentary record, the warm and ever-wet climate is recognized by proxies that indicate MAP > 2000 mm with low seasonal intermittency, and MAT > 20°C. Where quantitative estimates are not available, we use the occurrence of evergreen broadleaf vegetation types such as palm, mangrove, and shorea, oxisol to ultisol soil types, and kaolinite group clay minerals. Vegetation type is largely a function of temperature seasonality, effective precipitation and climate extremes, as plants tend to be sensitive and exhibit characteristics to capitalize on available resources35, 59. Oxisols and ultisols are highly weathered soils formed by the temperature and precipitation conditions favorable of chemical weathering via hydrolysis55, 58. Increasing hydrolysis of silicate minerals produces a predictable series of secondary clay minerals ranging from smectite under seasonal conditions to kaolinite under ever-wet conditions20, 55.

*Warm monsoonal (WM) or cool monsoonal (CM)*

This climate type includes the the tropical monsoonal (Am) climate in the Köppen-Geiger classification. It is defined based on highly seasonal precipitation linked to global monsoon circulation and related cyclones, as a function of the seasonal migration of the Inter-Tropical Convergence Zone (ITCZ; e.g. Wang and Ding 2008). More than 80–90% of annual precipitation in monsoon regions falls during the summer monsoon25. MAP is 500-2000 mm and MAT is >20°C in warm monsoon climates21, 22. Vegetation is dominated by evergreen and deciduous broadleaves such as palms, uvaria, and eucalyptus35, 60. Soil types tend to range from alfisols to ultisols, and the soil B-horizon is marked by smectite group clay minerals55, 58. A modern example of a warm monsoon climate is India. With the cool monsoon climate, we diverge from the Köppen-Geiger classification because it relies primarily on temperature, whereas we define climates. We use the monsoon precipitation index25 to identify the cool monsoonal climate type, such as in Japan where MAT is ca. 12°C.

In the Paleogene sedimentary record, the monsoonal climate is recognized by proxies that indicate MAP 500-2000 mm with a high seasonal intermittency. Warm monsoonal climates are identified when MAT >20°C and cool monsoonal when MAT <20°C. Where quantitative estimates are not available, we use the occurrence of deciduous and evergreen broadleaf vegetation types such as palms, uvaria, eucalyptus, and potentially conifer in cool monsoonal climates, alfisol to ultisol soil types, and smectite group clay minerals. Precipitation intermittency leads to the dominance of trees adapted to a wide range of conditions, where depending on the length of the monsoon season, there may or may not be a definite growing season35, 59. Alfisols are moderately leached soils formed under forest cover, while ultisols are strongly leached, and their occurrence depends on the favorability of temperature and precipitation conditions55, 58. Strong seasonality tends to promote hydrolysis of parent material to form smectite group clay minerals20, 55. There are also sedimentological proxies, such as the presence of fluvial fans, in combination with an abundance or dominance of Froude supercritical flow sedimentary structures, in-channel bioturbation and pedogenic modification52. These sedimentological proxies collectively indicate fluctuations in discharge as a result of highly seasonal precipitation in climatic settings that promote marked seasonal and interannual hydrological changes, leading to intermittent discharge regimes and exceptional flood events51, 52. These sedimentological proxies thus provide valuable information on precipitation intensity and intermittency or seasonality but need to be used in a multi-proxy analyses in order to indicate a climate type.

*Sub-humid (WS) or semi-arid (CS)*

Sub-humid and semi-arid climates are defined by seasonally and interannually intermittent precipitation and correspond to the savannah (Aw) or steppe (BSh and BSk) climates in the Köppen-Geiger classification. MAP may be similar to the monsoon zone, but the dry season precipitation tends to be lower and inter-annual intermittency considerably higher22, 25. Sub-humid climates receive monsoon rain only during extreme monsoon trough migration or abnormal or strengthened monsoon seasons and associated cyclonic flow and thus experience extreme inter-annual precipitation intermittency25. Sub-humid climates experience lower MAP in the range of 500-2500 mm and MAT at >20°C, such as in northern Australia56. Vegetation is dominated by grasses and woody shrubs such as baobab trees and eucalyptus35, 56. Soil types tend to range from alfisols to aridisols, and the soil B-horizons may be characterized by base precipitation and palygorskite-sepiolite group clay minerals in drier regions55, 58.

Semi-arid climates are typically located in continental interiors and on the leeside of mountain ranges and receive little precipitation as a result. Some of these climates receive summer precipitation associated with monsoon migration, such as the southwestern United States or subtropical locations in central Australia25. Other semi-arid locations receive predominantly winter precipitation from extratropical frontal systems, such as California. MAP ranges from <500 to 1200 mm, while MAT may be quite cool or warm with temperatures ranging from –5 to 20°C21, 56. Vegetation is dominated by grasses and shrubs such as sage, juniperus, dry-adapted conifer, and legumes21, 62. Soil types tend to range from mollisols to vertisols, and the soil B-horizons may be marked by pedogenic carbonate or other base precipitation and palygorskite-sepiolite group clay minerals55, 58.

In the Paleogene sedimentary record, the sub-humid and semi-arid climates are not distinguishable and grouped together as a result. They are recognized by proxies that indicate MAP is between 500 and 2500 mm with a high seasonal and interannual intermittency. MAT ranges from >10°C to <20°C. Where quantitative estimates are not available, we use the occurrence of woody shrubland and grassland vegetation types such as eucalpytus or juniperus, alfisol, mollisol, or vertisol soil types, pedogenic carbonate nodules, palygorskite-sepiolite group clay minerals, and the sedimentological proxies that identify fluctuations in discharge. The limitation of precipitation and high temperatures lead to the dominance of small, woody plants and grasses35, as both precipitation and temperature intermittency encourages the growth of plants adapted to a wide range of conditions59. Mollisols form under cool, seasonal precipitation conditions under grassland cover, and vertisols are clay-rich soils that form under seasonal conditions58. Alfisols are moderately leached soils formed under forest cover, and their occurrence depends in part on the extent of precipitation seasonality58. Calcretes and magnesium clays of the palygorskite-sepiolite group are favorable under highly seasonal precipitation conditions due to the regular rise and fall in water table55.

*Warm arid (WA) or cool arid (CA)*

The arid climate type corresponds to BWh and BWk climates in the Köppen-Geiger classification and is defined as having highly intermittent precipitation and sustained aridity22, 25. Similar to the sub-humid and semi-arid climates, arid regions receive monsoon rain only during extreme monsoon trough migration or abnormal or strengthened monsoon seasons and associated cyclonic flow and thus experience extreme inter-annual precipitation intermittency, such as in central Australia today25. MAP is <500 mm and MAT is >20°C in warm arid climates and <20°C in cool arid climates21, 56. Vegetation is generally lacking35. Soil types tend to range from aridisols to entisols, and the soil B-horizons contain pedogenic carbonate nodules and clay minerals that are largely a function of parent material formed via physical weathering55, 58.

In the Paleogene sedimentary record, the arid climate is recognized by proxies that indicate MAP < 500 mm with a high seasonal and interannual intermittency, and MAT ~ 20°C, as we lacked the temperature data to distinguish between these climate types. We suspect many of the arid locations were warm arid due to the high global temperatures during the Early Paleogene. Where quantitative estimates are not available, we use the lack of vegetation, presence of poorly developed soil types that range from aridisols to entisols, pedogenic carbonate nodules, physically weathered clay minerals, and the sedimentological proxies that identify fluctuations in discharge. The high temperature and low precipitation prevent consistent growth of vegetation35. Low rates of chemical weathering may prevent the formation of mature soils in arid locations58. However, aridisols may form given enough time and chemical weathering58. High seasonality favors the precipitation of bases under low water table conditions55. Low precipitation prevents chemical weathering from occurring and favors the dominance of physical weathering of parent material55.

*Humid subtropical (HS) or cool temperate (CT)*

Cool, wet, low precipitation intermittency climates, such as the northeastern United States today, correspond to Cs, Cw, Cfb, Cfc, Ds, Dw, and Df in the Köppen-Geiger classification and have relatively low seasonal precipitation intermittency22, 25. Although all temperate climate types do experience some types of seasons, the annual precipitation range as compared with the annual mean is characteristically low25. Precipitation in temperate climates is primarily linked to tropical cyclones and thus monsoon circulation25. MAP is 500-2000 mm and MAT is <15°C21, 56. Vegetation is dominated by deciduous broadleaves and conifers such as metasequoia, magnolia, and ferns35, 49. Soil types tend to range from andisols to ultisols, and the soil B-horizon is marked by smectite to kaolinite group clay minerals55, 58.

Humid subtropical climates, such as the southeastern United States today, correspond to Cfa in the Köppen-Geiger classification22. Similar to the temperate climate, the annual precipitation range compared to the annual mean is low, and precipitation is linked to tropical cyclones and monsoon circulation in the warm season and extra-tropical atmospheric circulation in the winter25. MAP is 500-2000 mm and MAT is >15°C21, 56. Vegetation is a mixture of deciduous broadleaves and evergreen broadleaves such as palms, magnolia, and live oak. Soil types tend to be weathered and range from andisols to oxisols, and the B-horizon is marked by kaolinite group clay minerals55, 58.

In the Paleogene sedimentary record, temperate climates are recognized by proxies that indicate MAP between 500 and 2000 mm with a low or moderate seasonal intermittency, and MAT <15°C and >15°C in humid subtropical climates. Where quantitative estimates are not available, we use the occurrence of deciduous broadleaf and conifer vegetation types such as metasequoia, oak, ferns, and possibly palm due to low temperature seasonality, alfisol to ultisol soil types, smectite and/or kaolinite group clay minerals, and the lack of the sedimentological proxies that identify fluctuations in discharge to identity these climates. Seasonal temperature conditions favor a mixture of conifers that are cold adapted and deciduous broadleaf trees, or plant families that are adapted to a wide range of conditions and climate extremes35, 59. A difference between temperate climates of the Paleogene and those today is lower temperature seasonality during the Paleogene enabled growth of thermophilic taxa such as palms that could be found alongside other broadleaf and conifer49, 63. Alfisol to ultisol soil types occur depending on the degree of chemical weathering, where alfisols may be more common in mild conditions58. The formation of smectite group clay minerals via hydrolysis is favorable under moderate seasonality conditions, while kaolinite group clay minerals are favorable under ever-wet, low seasonality conditions55. Kaolinite clay minerals are likely to form in humid subtropical regions, particularly those that are warm and wet like the modern southeastern US55.

*Cold, dry with seasonal freeze-thaw (CD)*

Cold dry with seasonal freeze-thaw climates are defined by high seasonal intermittency in temperature and surface water availability and combine the cold and polar climate types of the Köppen-Geiger climate classification (Ds, Dw, ET, EF)22. MAP is >500-1500 mm and MAT is –5 to 5°C21, 56. Vegetation is dominated by tundra vegetation such as grasses and shrubbery, as well as boreal forests35. Soil types tend to range from spodosols to gelisols, and clay minerals are largely a function of parent material formed via physical weathering55, 58. This climate type was not identified in the Early Paleogene.

*Cool, ever-wet (CEW)*

Cool and ever-wet climates, such as the temperate rainforests of the Pacific Northwest, are characterized by ever-wet conditions, MAP > 2000 mm, and MAT <20°C21, 56. Where quantitative estimates are not available, we classify a region’s climate as cold and ever-wet based on the presence of mixed deciduous-evergreen broadleaf and conifer vegetation types such as the brush pepperbush, palm, and metasequoia35, 64, spodosol soil types58, and altered illite group clay minerals56. These successions also characteristically lack sedimentological proxies that identify fluctuations in discharge52, 53. Mixed deciduous, evergreen broadleaf vegetation types occur due to the relatively mild temperatures and high precipitation where some trees may grow year-round35. Spodosol soils are common in wet, cool environments where the buildup of organic material is favorable, and they form today in environments like the eastern Canadian coast and Northern Europe that are dominated by coniferous forests58. The mixture of cold and wet conditions favors a mixture of physical and chemical weathering to commonly produce altered illite group clay minerals55.

Data S1. (separate file)

Excel file containing all of the climate data and associated citations depicted in the maps.

**Data S2.**

<https://jslawson298.github.io/EarlyPaleogeneClimate/>

Link to webmap version of climate maps hosted on github. Note that the default is for all of the layers to be turned on at once. To view a single time period, disable all layers except for the time period’s location, climate type, and base map.

**Data S3. (separate file)**

ArcGIS Pro project file that will open the climate maps and associated data.

**References** *65-127 correspond to proxy data used in the Figures and Data S1.

1. K. D. Burke, J. W. Williams, M. A. Chandler, A. M. Haywood, D. J. Lunt, B. L. Otto-Bliesner, Pliocene and Eocene provide best analogs for near-future climates. *Proc. Natl. Acad. Sci. U. S. A.* **115**, 13288–13293 (2018).
2. J. E. Tierney, C. J. Poulsen, I. P. Montañez, T. Bhattacharya, R. Feng, H. L. Ford, B. Hönisch, G. N. Inglis, S. V. Petersen, N. Sagoo, C. R. Tabor, K. Thirumalai, J. Zhu, N. J. Burls, G. L. Foster, Y. Goddéris, B. T. Huber, L. C. Ivany, S. K. Turner, D. J. Lunt, J. C. McElwain, B. J. W. Mills, B. L. Otto-Bliesner, A. Ridgwell, Y. G. Zhang, Past climates inform our future. *Science*. **370** (2020), doi:10.1126/science.aay3701.
3. M. J. Carmichael, G. N. Inglis, M. P. S. Badger, B. D. A. Naafs, L. Behrooz, S. Remmelzwaal, F. M. Monteiro, M. Rohrssen, A. Farnsworth, H. L. Buss, A. J. Dickson, P. J. Valdes, D. J. Lunt, R. D. Pancost, Hydrological and associated biogeochemical consequences of rapid global warming during the Paleocene-Eocene Thermal Maximum. *Glob. Planet. Change*. **157**, 114–138 (2017).
4. J. C. Zachos, G. R. Dickens, R. E. Zeebe, An early Cenozoic perspective on greenhouse warming and carbon-cycle dynamics. *Nature*. **451**, 279–283 (2008).
5. W. Cornwall, Europe’s deadly floods leave scientists stunned. *Science*. **373**, 372–373 (2021).
6. V. Lauretano, J. C. Zachos, L. J. Lourens, Orbitally Paced Carbon and Deep-Sea Temperature Changes at the Peak of the Early Eocene Climatic Optimum. *Paleoceanogr. Paleoclimatology*. **33**, 1050–1065 (2018).
7. Y. Li, P. Sun, Z. Liu, Y. Bai, Y. Xu, L. Ma, R. Liu, Eocene hyperthermal events in the terrestrial system: Geochronological and astrochronological constraints in the Fushun Basin, NE China. *Mar. Pet. Geol.* **139**, 105604–105604 (2022).
8. M. J. Kraus, F. A. McInerney, S. L. Wing, R. Secord, A. A. Baczynski, J. I. Bloch, Paleohydrologic response to continental warming during the Paleocene-Eocene Thermal Maximum, Bighorn Basin, Wyoming. *Palaeogeogr. Palaeoclimatol. Palaeoecol.* **370**, 196–208 (2013).
9. S. L. Wing, G. J. Harrington, F. A. Smith, J. I. Bloch, D. M. Boyer, K. H. Freeman, Transient Floral Change and Rapid Global Warming at the Paleocene-Eocene Boundary. *Science*. **310**, 993–996 (2005).
10. R. E. Zeebe, A. Ridgwell, J. C. Zachos, Anthropogenic carbon release rate unprecedented during the past 66 million years. *Nat. Geosci.* **9**, 325–329 (2016).
11. K. J. Matthews, K. T. Maloney, S. Zahirovic, S. E. Williams, M. Seton, R. D. Müller, Global plate boundary evolution and kinematics since the late Paleozoic. *Glob. Planet. Change*. **146**, 226–250 (2016).
12. F. A. Mcinerney, S. L. Wing, The Paleocene-Eocene Thermal Maximum: A Perturbation of Carbon Cycle, Climate, and Biosphere with Implications for the Future INTRODUCTION AND BRIEF HISTORY OF STUDY. *Annu. Rev. Earth Planet. Sci. Online Earthannualreviewsorg*. **39**, 489–516 (2011).
13. K. Littler, U. Röhl, T. Westerhold, J. C. Zachos, A high-resolution benthic stable-isotope record for the South Atlantic: Implications for orbital-scale changes in Late Paleocene–Early Eocene climate and carbon cycling. *Earth Planet. Sci. Lett.* **401**, 18–30 (2014).
14. C. J. Hollis, T. Dunkley Jones, E. Anagnostou, P. K. Bijl, M. J. Cramwinckel, Y. Cui, G. R. Dickens, K. M. Edgar, Y. Eley, D. Evans, G. L. Foster, J. Frieling, G. N. Inglis, E. M. Kennedy, R. Kozdon, V. Lauretano, C. H. Lear, K. Littler, L. Lourens, A. Nele Meckler, B. D. A. Naafs, H. Pälike, R. D. Pancost, P. N. Pearson, U. Röhl, D. L. Royer, U. Salzmann, B. A. Schubert, H. Seebeck, A. Sluijs, R. P. Speijer, P. Stassen, J. Tierney, A. Tripati, B. Wade, T. Westerhold, C. Witkowski, J. C. Zachos, Y. Ge Zhang, M. Huber, D. J. Lunt, The DeepMIP contribution to PMIP4: Methodologies for selection, compilation and analysis of latest Paleocene and early Eocene climate proxy data, incorporating version 0.1 of the DeepMIP database. *Geosci. Model Dev.* **12**, 3149–3206 (2019).
15. M. J. Carmichael, R. D. Pancost, D. J. Lunt, Changes in the occurrence of extreme precipitation events at the Paleocene–Eocene thermal maximum. *Earth Planet. Sci. Lett.* **501**, 24–36 (2018).
16. I. M. Held, B. J. Soden, Robust Responses of the Hydrological Cycle to Global Warming. *J. Clim.* **19**, 5686–5699 (2006).
17. W. D. Rush, J. T. Kiehl, C. A. Shields, J. C. Zachos, Increased frequency of extreme precipitation events in the North Atlantic during the PETM: Observations and theory. *Palaeogeogr. Palaeoclimatol. Palaeoecol.* **568** (2021), doi:10.1016/j.palaeo.2021.110289.
18. B. A. Schubert, A. H. Jahren, J. J. Eberle, L. S. L. Sternberg, D. A. Eberth, A summertime rainy season in the Arctic forests of the Eocene. *Geology*. **40**, 523–526 (2012).
19. P. A. O’Gorman, Precipitation Extremes Under Climate Change. *Curr. Clim. Change Rep.* **1**, 49–59 (2015).
20. F. Tateo, Clay Minerals at the Paleocene–Eocene Thermal Maximum: Interpretations, Limits, and Perspectives. *Minerals*. **10(12)** (2020).
21. R. H. Whittaker, Classification of natural communities. *Bot. Rev.* **28**, 1–239 (1962).
22. M. C. Peel, B. L. Finlayson, T. A. Mcmahon, “Hydrology and Earth System Sciences Updated world map of the Köppen-Geiger climate classification” (2007), pp. 1633–1644.
23. L. Zhang, C. Wang, X. Li, K. Cao, Y. Song, B. Hu, D. Lu, Q. Wang, X. Du, S. Cao, A new paleoclimate classification for deep time. *Palaeogeogr. Palaeoclimatol. Palaeoecol.* **443**, 98–106 (2016).
24. S. Brönnimann, A. M. Fischer, E. Rozanov, P. Poli, G. P. Compo, P. D. Sardeshmukh, Southward shift of the northern tropical belt from 1945 to 1980. *Nat. Geosci.* **8**, 969–974 (2015).
25. B. Wang, Q. Ding, Global monsoon: Dominant mode of annual variation in the tropics. *Dyn. Atmospheres Oceans*. **44**, 165–183 (2008).
26. J. Zachos, M. Pagani, L. Sloan, E. Thomas, K. Billups, Trends, Rhythms, and Aberrations in Global Climate 65 Ma to Present. *Science*. **292**, 686–693 (2001).
27. M. J. Cramwinckel, M. Huber, I. J. Kocken, C. Agnini, P. K. Bijl, S. M. Bohaty, J. Frieling, A. Goldner, F. J. Hilgen, E. L. Kip, F. Peterse, R. Van Der Ploeg, U. Röhl, S. Schouten, A. Sluijs, Synchronous tropical and polar temperature evolution in the Eocene. *Nature*. **559**, 382–386 (2018).
28. P. Xue, L. Chang, E. Thomas, Abrupt Northwest Atlantic deep-sea oxygenation decline preceded the Palaeocene-Eocene Thermal Maximum. *Earth Planet. Sci. Lett.* **618**, 118304–118304 (2023).
29. K. L. Zellman, P. Plink-Björklund, H. C. Fricke, Testing hypotheses on signatures of precipitation variability in the river and floodplain deposits of the paleogene san juan basin, New Mexico, U.S.A. *J. Sediment. Res.* **90**, 1770–1801 (2020).
30. B. Z. Foreman, P. L. Heller, M. T. Clementz, Fluvial response to abrupt global warming at the Palaeocene/Eocene boundary. *Nature*. **491**, 92–95 (2012).
31. A. J. McMichael, R. E. Woodruff, S. Hales, Climate change and human health: present and future risks. *The Lancet*. **367**, 859–869 (2006).
32. R. Knutti, J. Sedláček, Robustness and uncertainties in the new CMIP5 climate model projections. *Nat. Clim. Change*. **3**, 369–373 (2013).
33. N. Herold, J. Buzan, M. Seton, A. Goldner, J. A. M. Green, R. D. Müller, P. Markwick, M. Huber, A suite of early Eocene (∼ 55 Ma) climate model boundary conditions. *Geosci. Model Dev.* **7**, 2077–2090 (2014).
34. L. P. Birgenheier, M. D. V. Berg, P. Plink-Björklund, R. D. Gall, E. Rosencrans, M. J. Rosenberg, L. C. Toms, J. Morris, Climate impact on fluvial-lake system evolution, Eocene Green River Formation, Uinta Basin, Utah, USA. *Bull. Geol. Soc. Am.* **132**, 562–587 (2020).
35. E. I. Woodward, B. G. Williams, “Climate and plant distribution at global and local scales” (1987), pp. 189–197.
36. C. A. Loptson, D. J. Lunt, J. E. Francis, Investigating vegetation–climate feedbacks during the early Eocene. *Clim. Past*. **10**, 419–436 (2014).
37. V. A. Korasidis, S. L. Wing, C. A. Shields, J. T. Kiehl, Global Changes in Terrestrial Vegetation and Continental Climate During the Paleocene-Eocene Thermal Maximum. *Paleoceanogr. Paleoclimatology*. **37** (2022), doi:10.1029/2021PA004325.
38. J. Zhu, C. J. Poulsen, J. E. Tierney, Simulation of Eocene extreme warmth and high climate sensitivity through cloud feedbacks. *Sci. Adv.* **5**, eaax1874 (2019).
39. M. Baatsen, P. Bijl, A. Von Der Heydt, A. Sluijs, H. Dijkstra, Resilient Antarctic monsoonal climate prevented ice growth during the Eocene, doi:10.5194/cp-2023-36.
40. J. T. Kiehl, C. M. Zarzycki, C. A. Shields, M. V. Rothstein, Simulated changes to tropical cyclones across the Paleocene-Eocene Thermal Maximum (PETM) boundary. *Palaeogeography, Palaeoclimatology, Palaeoecology*. **572**, 110421 (2021).
41. D. B. Lobell, W. Schlenker, J. Costa-Roberts, Climate Trends and Global Crop Production Since 1980. *Science*. **333**, 616–620 (2011).
42. H. Jenny, *Factors of soil formation: a system of quantitative pedology.* (McGraw Hill book company, Inc., 1941).
43. M. J. Kraus, S. T. Hasiotis, Significance of Different Modes of Rhizolith Preservation to Interpreting Paleoenvironmental and Paleohydrologic Settings: Examples from Paleogene Paleosols, Bighorn Basin, Wyoming, U.S.A. *J. Sediment. Res.* **76**, 633–646 (2006).
44. N. D. Sheldon, G. J. Retallack, S. Tanaka, Geochemical Climofunctions from North American Soils and Application to Paleosols across the Eocene‐Oligocene Boundary in Oregon. *The Journal of Geology*. **110**, 687–696 (2002).
45. G. E. Stinchcomb, L. C. Nordt, S. G. Driese, W. E. Lukens, F. C. Williamson, J. D. Tubbs, A data-driven spline model designed to predict paleoclimate using paleosol geochemistry. *Am. J. Sci.* **316**, 746–777 (2016).
46. W. E. Lukens, G. E. Stinchcomb, L. C. Nordt, D. J. Kahle, S. G. Driese, J. D. Tubbs, Recursive partitioning improves paleosol proxies for rainfall. *Am. J. Sci.* **319**, 819–845 (2019).
47. P. Wilf, When are leaves good thermometers? A new case for Leaf Margin Analysis. *Paleobiology*. **23**, 373–390 (1997).
48. P. Wilf, S. L. Wing, D. R. Greenwood, C. L. Greenwood, Using fossil leaves as paleoprecipitation indicators: An Eocene example. *Geology*. **26**, 203 (1998).
49. D. R. Greenwood, S. B. Archibald, R. W. Mathewes, P. T. Moss, Fossil biotas from the Okanagan Highlands, southern British Columbia and northeastern Washington State: Climates and ecosystems across an Eocene landscape. *Can. J. Earth Sci.* **42**, 167–185 (2005).
50. C. R. Fielding, J. P. Allen, J. Alexander, M. R. Gibling, Facies model for fluvial systems in the seasonal tropics and subtropics. *Geology*. **37**, 623–626 (2009).
51. P. Plink-Björklund, Morphodynamics of rivers strongly affected by monsoon precipitation: Review of depositional style and forcing factors. *Sediment. Geol.* **323**, 110–147 (2015).
52. C. R. Fielding, Upper flow regime sheets, lenses and scour fills: Extending the range of architectural elements for fluvial sediment bodies. *Sediment. Geol.* **190**, 227–240 (2006).
53. M. R. Hansford, P. Plink-Björklund, E. R. Jones, Global quantitative analyses of river discharge variability and hydrograph shape with respect to climate types. *Earth-Science Reviews*. **200**, 102977 (2020).
54. M.-P. Bolle, T. Adatte, Palaeocene- early Eocene climatic evolution in the Tethyan realm: clay mineral evidence. Clay miner. 36, 249–261 (2001).
55. H. Chamley, “Clay Sedimentology” (1989).
56. T. Reichgelt, D. R. Greenwood, S. Steinig, J. G. Conran, D. K. Hutchinson, D. J. Lunt, L. J. Scriven, J. Zhu, Plant Proxy Evidence for High Rainfall and Productivity in the Eocene of Australia. *Paleoceanogr. Paleoclimatology*. **37** (2022), doi:10.1029/2022pa004418.
57. V. Prasad, T. Utescher, A. Sharma, I. B. Singh, R. Garg, B. Gogoi, J. Srivastava, P. R. Uddandam, M. M. Joachimski, Low-latitude vegetation and climate dynamics at the Paleocene-Eocene transition – A study based on multiple proxies from the Jathang section in northeastern India. *Palaeogeogr. Palaeoclimatol. Palaeoecol.* **497**, 139–156 (2018).
58. K. Scheffe, J. Shaw, M. Stolt, D. Weindorf, Illustrated Guide to Soil Taxonomy, version 2. *US Dep. Agric. Nat. Resour. Conserv. Serv. Natl. Soil Surv. Cent. Linc. Neb.* (2015).
59. E. Huang, Y. Chen, M. Fang, Y. Zheng, S. Yu, Environmental drivers of plant distributions at global and regional scales. *Glob. Ecol. Biogeogr.* **30**, 697–709 (2021).
60. A. Shukla, R. C. Mehrotra, R. A. Spicer, T. E. V. Spicer, M. Kumar, Cool equatorial terrestrial temperatures and the South Asian monsoon in the Early Eocene: Evidence from the Gurha Mine, Rajasthan, India. *Palaeogeogr. Palaeoclimatol. Palaeoecol.* **412**, 187–198 (2014).
61. P. Lionello, P. Malanotte-Rizzoli, R. Boscolo, P. Alpert, V. Artale, L. Li, J. Luterbacher, W. May, R. Trigo, M. Tsimplis, U. Ulbrich, E. Xoplaki, "The Mediterranean climate: An overview of the main characteristics and issues" in *Developments in Earth and Environmental Sciences* (Elsevier, 2006; https://linkinghub.elsevier.com/retrieve/pii/S1571919706800030), vol. 4, pp. 1–26.
62. S. L. Wing, E. D. Currano, Plant response to a global greenhouse event 56 million years ago. *American Journal of Botany*. **100**, 1234–1254 (2013).
63. F. Grímsson, G. W. Grimm, A. J. Potts, R. Zetter, S. S. Renner, A Winteraceae pollen tetrad from the early Paleocene of western Greenland, and the fossil record of Winteraceae in Laurasia and Gondwana. Journal of Biogeography. 45, 567–581 (2018).
64. P. Schulte, R. P. Speijer, Late Maastrichtian-early paleocene sea level and climate changes in the Antioch Church Core (Alabama, Gulf of Mexico margin, USA): A multi-proxy approach. Geologica Acta. 7, 11–34 (2009).
65. T. M. Lehman, Paleosols and the Cretaceous/Tertiary transition in the Big Bend region of Texas. Geol. 18, 362 (1990).
66. J. A. Wolfe, D. L. Dilcher, Late Paleocene through middle Eocene climates in lowland North America. GFF. 122, 184–185 (2000).
67. B. Ellis, Evidence for an in situ early Paleocene rainforest from Castle Rock, Colorado. Rocky Mountain Geology. 38, 73–100 (2003).
68. M. A. Torres, R. R. Gaines, Paleoenvironmental and paleoclimatic interpretations of the late paleocene goler formation, Southern California, U.S.A., based on paleosol geochemistry. Journal of Sedimentary Research. 83, 591–605 (2013).
69. H. Hao, D. K. Ferguson, G.-P. Feng, A. Ablaev, Y.-F. Wang, C.-S. Li, Early Paleocene vegetation and climate in Jiayin, NE China. Climatic Change. 99, 547–566 (2010).
70. L. Domingo, N. López-Martínez, R. Soler-Gijón, S. T. Grimes, A multi-proxy geochemical investigation of the early Paleocene (Danian) continental palaeoclimate at the Fontllonga-3 site (South Central Pyrenees, Spain). Palaeogeography, Palaeoclimatology, Palaeoecology. 256, 71–85 (2007).
71. T. M. Schwartz, M. Dechesne, K. L. Zellman, Evidence for variable precipitation and discharge from upper cretaceous-paleogene fluvial deposits of the Raton Basin, Colorado-New Mexico, U.S.A. Journal of Sedimentary Research. 91, 571–594 (2021).
72. A. G. Flynn, D. J. Peppe, Early Paleocene tropical forest from the Ojo Alamo Sandstone, San Juan Basin, New Mexico, USA (2019), doi:10.5061/dryad.j0k8370.
73. I. Poole, D. Cantrill, T. Utescher, A multi-proxy approach to determine Antarctic terrestrial palaeoclimate during the Late Cretaceous and Early Tertiary. Palaeogeography, Palaeoclimatology, Palaeoecology. 222, 95–121 (2005).
74. Y. Gao, D. E. Ibarra, J. K. Caves Rugenstein, J. Chen, T. Kukla, K. Methner, Y. Gao, H. Huang, Z. Lin, L. Zhang, D. Xi, H. Wu, A. R. Carroll, S. A. Graham, C. P. Chamberlain, C. Wang, Terrestrial climate in mid-latitude East Asia from the latest Cretaceous to the earliest Paleogene: A multiproxy record from the Songliao Basin in northeastern China. Earth-Science Reviews. 216 (2021).
75. E. M. Kennedy, Late Cretaceous and Paleocene terrestrial climates of New Zealand: Leaf fossil evidence from South Island assemblages. New Zealand Journal of Geology and Geophysics. 46, 295–306 (2003).
76. D. J. Peppe, Megafloral change in the early and middle Paleocene in the Williston Basin, North Dakota, USA. Palaeogeography, Palaeoclimatology, Palaeoecology. 298, 224–234 (2010).
77. R. D. Pancost, K. W. R. Taylor, G. N. Inglis, E. M. Kennedy, L. Handley, C. J. Hollis, E. M. Crouch, J. Pross, M. Huber, S. Schouten, P. N. Pearson, H. E. G. Morgans, J. I. Raine, Early Paleogene evolution of terrestrial climate in the SW Pacific, Southern New Zealand. Geochemistry, Geophysics, Geosystems. 14, 5413–5429 (2013).
78. M. E. Collinson, D. C. Steart, G. J. Harrington, J. J. Hooker, A. C. Scott, L. O. Allen, I. J. Glasspool, S. J. Gibbons, Palynological evidence of vegetation dynamics in response to palaeoenvironmental change across the onset of the Paleocene_Eocene Thermal Maximum at Cobham, Southern England. Grana. 48, 38–66 (2009).
79. S. L. Wing, F. Herrera, C. A. Jaramillo, C. Gómez-Navarro, P. Wilf, C. C. Labandeira, Late Paleocene fossils from the Cerrejón Formation, Colombia, are the earliest record of Neotropical rainforest. Proc. Natl. Acad. Sci. U.S.A. 106, 18627–18632 (2009).
80. D. R. Greenwood, J. F. Basinger, R. Y. Smith, How wet was the Arctic Eocene rain forest? Estimates of precipitation from Paleogene Arctic macrofloras. Geology. 38, 15–18 (2010).
81. C. Quan, Y. S. Liu, T. Utescher, Paleogene evolution of precipitation in northeastern china supporting the middle eocene intensification of the East Asian monsoon. Palaios. 26, 743–753 (2011).
82. D. R. Greenwood, P. T. Moss, A. I. Rowett, A. J. Vadala, R. L. Keefe, Plant communities and climate change in southeastern Australia during the early Paleogene. Special Paper of the Geological Society of America. 369, 365–380 (2003).
83. P. Wilf, Late Paleocene–early Eocene climate changes in southwestern Wyoming: Paleobotanical analysis. Geological Society of America Bulletin (2000).
84. Z. Chen, Z. Ding, S. Yang, C. Zhang, X. Wang, Increased precipitation and weathering across the Paleocene-Eocene Thermal Maximum in central China. Geochemistry, Geophysics, Geosystems. 17, 2286–2297 (2016).
85. E. Andrews, T. White, C. Del Papa, Paleosol-based paleoclimate reconstruction of the Paleocene-Eocene Thermal Maximum, northern Argentina. Palaeogeography, Palaeoclimatology, Palaeoecology. 471, 181–195 (2017).
86. J. R. Kelson, D. Watford, C. Bataille, K. W. Huntington, E. Hyland, G. J. Bowen, Warm Terrestrial Subtropics During the Paleocene and Eocene: Carbonate Clumped Isotope (Δ47) Evidence From the Tornillo Basin, Texas (USA). *Paleoceanography and Paleoclimatology*. **33**, 1230–1249 (2018).
87. B. Schmitz, V. Pujalte, Abrupt increase in seasonal extreme precipitation at the Paleocene-Eocene boundary. Geology. 35, 215–218 (2007).
88. S. Garel, J. Schnyder, J. Jacob, C. Dupuis, M. Boussafir, C. Le Milbeau, J.-Y. Storme, A. I. Iakovleva, J. Yans, F. Baudin, C. Fléhoc, F. Quesnel, Paleohydrological and paleoenvironmental changes recorded in terrestrial sediments of the Paleocene-Eocene boundary (Normandy, France) (2013).
89. G. J. Bowen, B. B. Bowen, Mechanisms of PETM global change constrained by a new record from central Utah. Geology. 36, 379–382 (2008).
90. S. Morón, D. L. Fox, J. M. Feinberg, C. Jaramillo, G. Bayona, C. Montes, J. I. Bloch, Climate change during the Early Paleogene in the Bogotá Basin (Colombia) inferred from paleosol carbon isotope stratigraphy, major oxides, and environmental magnetism. Palaeogeography, Palaeoclimatology, Palaeoecology. 388, 115–127 (2013).
91. S. Khanolkar, J. Sharma, Record of Early to Middle Eocene paleoenvironmental changes from lignite mines, western India. Journal of Micropalaeontology. 38, 1–24 (2019).
92. K. R. Johnson, Overview of the Late Cretaceous, early Paleocene, and early Eocene megafloras of the Denver Basin, Colorado. Rocky Mountain Geology. 38, 101–120 (2003).
93. L. Handley, A. O’Halloran, P. N. Pearson, E. Hawkins, C. J. Nicholas, S. Schouten, I. K. McMillan, R. D. Pancost, Changes in the hydrological cycle in tropical East Africa during the Paleocene-Eocene Thermal Maximum. Palaeogeography, Palaeoclimatology, Palaeoecology. 329–330, 10–21 (2012).
94. C. K. West, D. R. Greenwood, J. F. Basinger, Was the Arctic Eocene “rainforest” monsoonal? Estimates of seasonal precipitation from early Eocene megafloras from Ellesmere Island, Nunavut. Earth and Planetary Science Letters. 427, 18–30 (2015).
95. Y. Xie, F. Wu, X. Fang, Abrupt collapse of a swamp ecosystem in northeast China during the Paleocene–Eocene Thermal Maximum. Palaeogeography, Palaeoclimatology, Palaeoecology. 595, 110975 (2022).
96. L. Contreras, J. Pross, P. K. Bijl, R. B. O’hara, J. I. Raine, A. Sluijs, H. Brinkhuis, Southern high-latitude terrestrial climate change Southern high-latitude terrestrial climate change during the Paleocene-Eocene derived from a marine pollen record (ODP Site 1172, East Tasman Plateau) Southern high-latitude terrestrial climate change. Clim. Past Discuss. 10, 291–340 (2014).
97. Peter Wilf, Late Paleocene - early Eocene climate changes in southwestern Wyoming: Paleobotanical analysis. GSA Bulletin. 112, 292–307 (2000).
98. M. Dechesne, E. D. Currano, R. E. Dunn, P. Higgins, J. H. Hartman, K. R. Chamberlain, C. S. Holm-Denoma, A new stratigraphic framework and constraints for the position of the paleocene-eocene boundary in the rapidly subsiding Hanna Basin, Wyoming. Geosphere. 16, 594–618 (2020).
99. Y. Xie, F. Wu, X. Fang, A transient south subtropical forest ecosystem in central China driven by rapid global warming during the Paleocene-Eocene Thermal Maximum. Gondwana Research. 101, 192–202 (2022).
100. M. Pole, Ecology of paleocene-eocene vegetation at Kakahu, South Canterbury, New Zealand. Palaeontologia Electronica. 132 (2010).
101. L. Handley, E. M. Crouch, R. D. Pancost, A New Zealand record of sea level rise and environmental change during the Paleocene-Eocene Thermal Maximum. Palaeogeography, Palaeoclimatology, Palaeoecology. 305, 185–200 (2011).
102. P. Qin, D. Zhong, C. Su, X. Yang, H. Sun, H. Zhang, L. Song, Y. Yang, H. Wang, A unique saline lake sequence in the eastern Tethyan Ocean in responses to the Palaeocene-Eocene thermal maximum: A case study in the Kuqa Depression, Tarim Basin, NW China. *Journal of Asian Earth Sciences*. **250**, 105594 (2023).
103. P. Stassen, E. Thomas, R. P. Speijer, Integrated stratigraphy of the Paleocene-Eocene thermal maximum in the New Jersey Coastal Plain: Toward understanding the effects of global warming in a shelf environment: PETM IN THE NEW JERSEY COASTAL PLAIN. *Paleoceanography*. **27** (2012), doi:10.1029/2012PA002323.
104. J. S. Eldrett, D. R. Greenwood, M. Polling, H. Brinkhuis, A. Sluijs, A seasonality trigger for carbon injection at the Paleocene-Eocene Thermal Maximum. Climate of the Past. 10, 759–769 (2014).
105. C. Robert, H. Chamley, Development of early Eocene warm climates, as inferred from clay mineral variations in oceanic sediments. Global and Planetary Change. 3, 315–331 (1991).
106. H. Egger, M. Homayoun, H. Huber, F. Rögl, B. Schmitz, Early Eocene climatic, volcanic, and biotic events in the northwestern Tethyan Untersberg section, Austria. Palaeogeography, Palaeoclimatology, Palaeoecology. 217, 243–264 (2005).
107. I. C. Harding, A. J. Charles, J. E. A. Marshall, H. Pälike, A. P. Roberts, P. A. Wilson, E. Jarvis, R. Thorne, E. Morris, R. Moremon, R. B. Pearce, S. Akbari, Sea-level and salinity fluctuations during the Paleocene–Eocene thermal maximum in Arctic Spitsbergen. Earth and Planetary Science Letters. 303, 97–107 (2011).
108. S. Garel, J. Schnyder, J. Jacob, C. Dupuis, M. Boussafir, C. Le Milbeau, J.-Y. Storme, A. I. Iakovleva, J. Yans, F. Baudin, C. Fléhoc, F. Quesnel, Paleohydrological and paleoenvironmental changes recorded in terrestrial sediments of the Paleocene–Eocene boundary (Normandy, France). *Palaeogeography, Palaeoclimatology, Palaeoecology*. **376**, 184–199 (2013).
109. B.J. Evraets, thesis, University of Idaho, Moscow, ID (2012).
110. R. L. Breedlovestrout, B. J. Evraets, J. T. Parrish, New Paleogene paleoclimate analysis of western Washington using physiognomic characteristics from fossil leaves. Palaeogeography, Palaeoclimatology, Palaeoecology. 392, 22–40 (2013).
111. E. R. Clechenko, D. C. Kelly, G. J. Harrington, C. A. Stiles, Terrestrial records of a regional weathering profile at the Paleocene-Eocene boundary in the Williston Basin of North Dakota. Bulletin of the Geological Society of America. 119, 428–442 (2007).
112. H. C. Fricke, Oxygen isotope and paleobotanical estimates of temperature and 18O-latitude gradients over North America during the early Eocene. American Journal of Science. 304, 612–635 (2004).
113. Z. Chen, X. Dong, X. Wang, Z. Tang, S. Yang, M. Zhu, Z. Ding, Spatial change of precipitation in response to the Paleocene-Eocene thermal Maximum warming in China. Global and Planetary Change. 194, 103313 (2020).
114. E. G. Hyland, N. D. Sheldon, J. M. Cotton, Constraining the early Eocene climatic optimum: A terrestrial interhemispheric comparison. Bulletin of the Geological Society of America. 129, 244–252 (2017).
115. H. A. Abels, M. J. Kraus, P. D. Gingerich, Precession-scale cyclicity in the fluvial lower Eocene Willwood Formation of the Bighorn Basin, Wyoming (USA). Sedimentology. 60, 1467–1483 (2013).
116. S. L. Wing, J. Alroy, L. J. Hickey, Plant and mammal diversity in the Paleocene to early Eocene of the Bighorn Basin. Palaeogeography, Palaeoclimatology, Palaeoecology. 115, 117–155 (1995).
117. E. M. Crouch, C. L. Shepherd, H. E. G. Morgans, B. D. A. Naafs, E. Dallanave, A. Phillips, C. J. Hollis, R. D. Pancost, Climatic and environmental changes across the early Eocene climatic optimum at mid-Waipara River, Canterbury Basin, New Zealand. Earth-Science Reviews. 200, 102961 (2020).
118. S. Passchier, S. M. Bohaty, F. Jiménez-Espejo, J. Pross, U. Röhl, T. Van De Flierdt, C. Escutia, H. Brinkhuis, Early eocene to middle miocene cooling and aridification of east antarctica. Geochemistry, Geophysics, Geosystems. 14, 1399–1410 (2013).
119. M. Sol Raigemborn, S. Lizzoli, E. Hyland, J. Cotton, L. E. Gómez Peral, E. Beilinson, J. M. Krause, A paleopedological approach to understanding Eocene environmental conditions in southern Patagonia, Argentina. Palaeogeography, Palaeoclimatology, Palaeoecology. 601, 111129–111129 (2022).
120. E. G. Hyland, N. D. Sheldon, Coupled CO2-climate response during the Early Eocene Climatic Optimum. Palaeogeography, Palaeoclimatology, Palaeoecology. 369, 125–135 (2013).
121. R. W. Mathewes, D. R. Greenwood, S. B. Archibald, Paleoenvironment of the Quilchena flora, British columbia, during the early eocene climatic optimum. Canadian Journal of Earth Sciences. 53, 574–590 (2016).
122. M. T. Hren, M. Pagani, D. M. Erwin, M. Brandon, Biomarker reconstruction of the early Eocene paleotopography and paleoclimate of the northern Sierra Nevada. Geology. 38, 7–10 (2010).
123. S. L. Wing, D. R. Greenwood, Fossils and fossil climate: the case for equable continental interiors in the Eocene. Phil. Trans. R. Soc. Lond. B. 341, 243–252 (1993).
124. L. Bougeois, G. Dupont-Nivet, M. de Rafélis, J. C. Tindall, J. N. Proust, G. J. Reichart, L. J. de Nooijer, Z. Guo, C. Ormukov, Asian monsoons and aridification response to Paleogene sea retreat and Neogene westerly shielding indicated by seasonality in Paratethys oysters. Earth and Planetary Science Letters. 485, 99–110 (2018).
125. L. Honegger, T. Adatte, J. E. Spangenberg, J. K. C. Rugenstein, M. Poyatos-Moré, C. Puigdefàbregas, E. Chanvry, J. Clark, A. Fildani, E. Verrechia, K. Kouzmanov, M. Harlaux, S. Castelltort, Alluvial record of an early Eocene hyperthermal within the Castissent Formation, the Pyrenees, Spain. Clim. Past. 16, 227–243 (2020).
126. L. Contreras, J. Pross, P. K. Bijl, A. Koutsodendris, J. I. Raine, B. van de Schootbrugge, H. Brinkhuis, Early to Middle Eocene vegetation dynamics at the Wilkes Land Margin (Antarctica). Review of Palaeobotany and Palynology. 197, 119–142 (2013).
127. E. Hyland, N. D. Sheldon, M. Fan, Terrestrial paleoenvironmental reconstructions indicate transient peak warming during the early Eocene climatic optimum. Bulletin of the Geological Society of America. 125, 1338–1348 (2013).
